# Supplementary material for: Prediction of delayed graft function by early salivary microbiota following kidney transplantation
Source: Springer Nature journal article supplement (doi:10.1007/s00253-024-13236-w), 2024-07-01
Supplement: MOESM1 [file 253_2024_13236_MOESM1_ESM.pdf]

# Supplemental Material

**Journal name:**

Applied Microbiology and Biotechnology

**Manuscript Title:**

Prediction of Delayed Graft Function by Early Salivary Microbiota Following Kidney Transplantation

**The name(s) of the author(s):**

Xuyu Xiang<sup>1,2,†</sup>, Bo Peng<sup>1,2,†</sup>, Kai Liu<sup>1,2</sup>, Tianyin Wang<sup>1,2</sup>, Peng Ding<sup>1,2</sup>, Yi Zhu<sup>1,2</sup>, Ke Cheng<sup>1,2</sup> and Yingzi Ming<sup>1,2,\*</sup>

**The affiliation(s) and address(es) of the author(s):**

1 The Transplantation Center of the Third Xiangya Hospital, Central South University, Changsha 410013, China

2 Engineering and Technology Research Center for Transplantation Medicine of National Health

**The e-mail address, telephone and fax numbers of the corresponding author:**

Yingzi Ming,

[mingyz\\_china@csu.edu.cn](mailto:mingyz_china@csu.edu.cn)

+86 133 0731 8463

No fax numbers

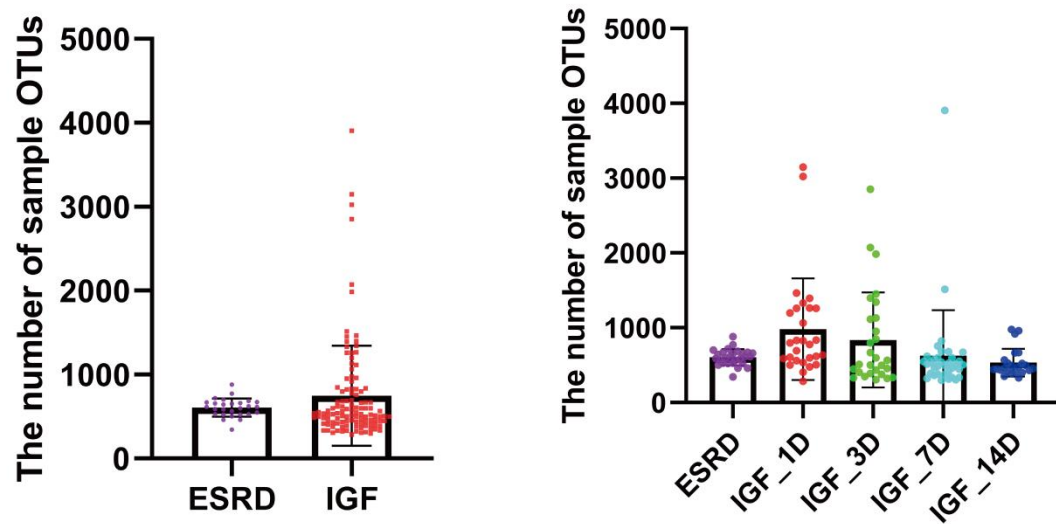

Supplemental Fig. S1. The number of sample OTUs of ESRD, IGF, IGF\_1D, IGF\_3D, IGF\_7D and IGF\_14D groups: (A) The number of sample OTUs of ESRD and IGF groups; (B) The number of sample OTUs of ESRD, IGF\_1D, IGF\_3D, IGF\_7D and IGF\_14D groups.

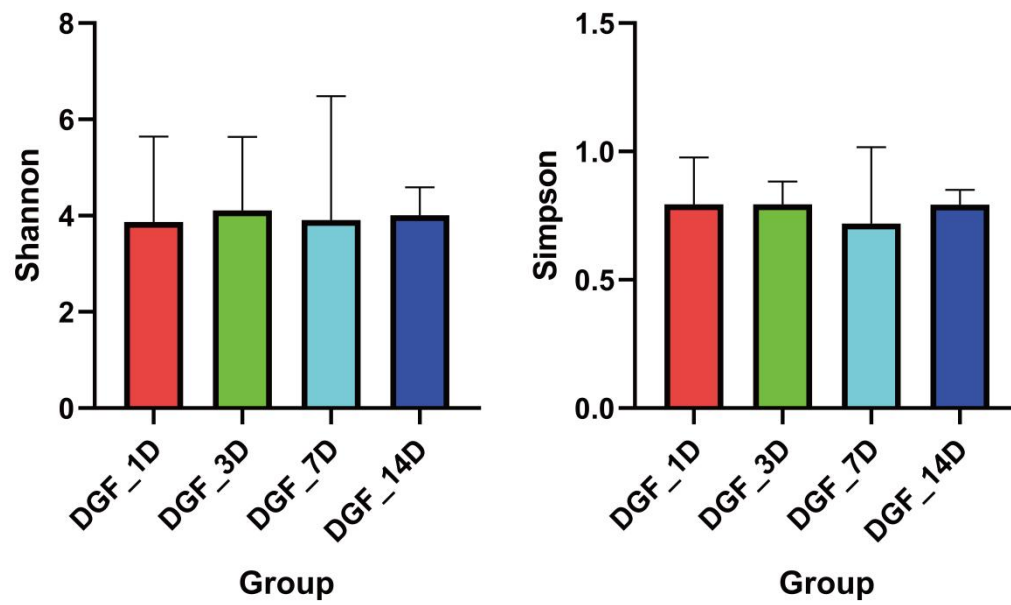

Supplemental Fig. S2. Shannon and Simpson index of DGF\_1D, DGF\_3D, DGF\_7D and DGF\_14D: (A) Shannon index of DGF\_1D, DGF\_3D, DGF\_7D and DGF\_14D; (B) Simpson index of DGF\_1D, DGF\_3D, DGF\_7D and DGF\_14D.

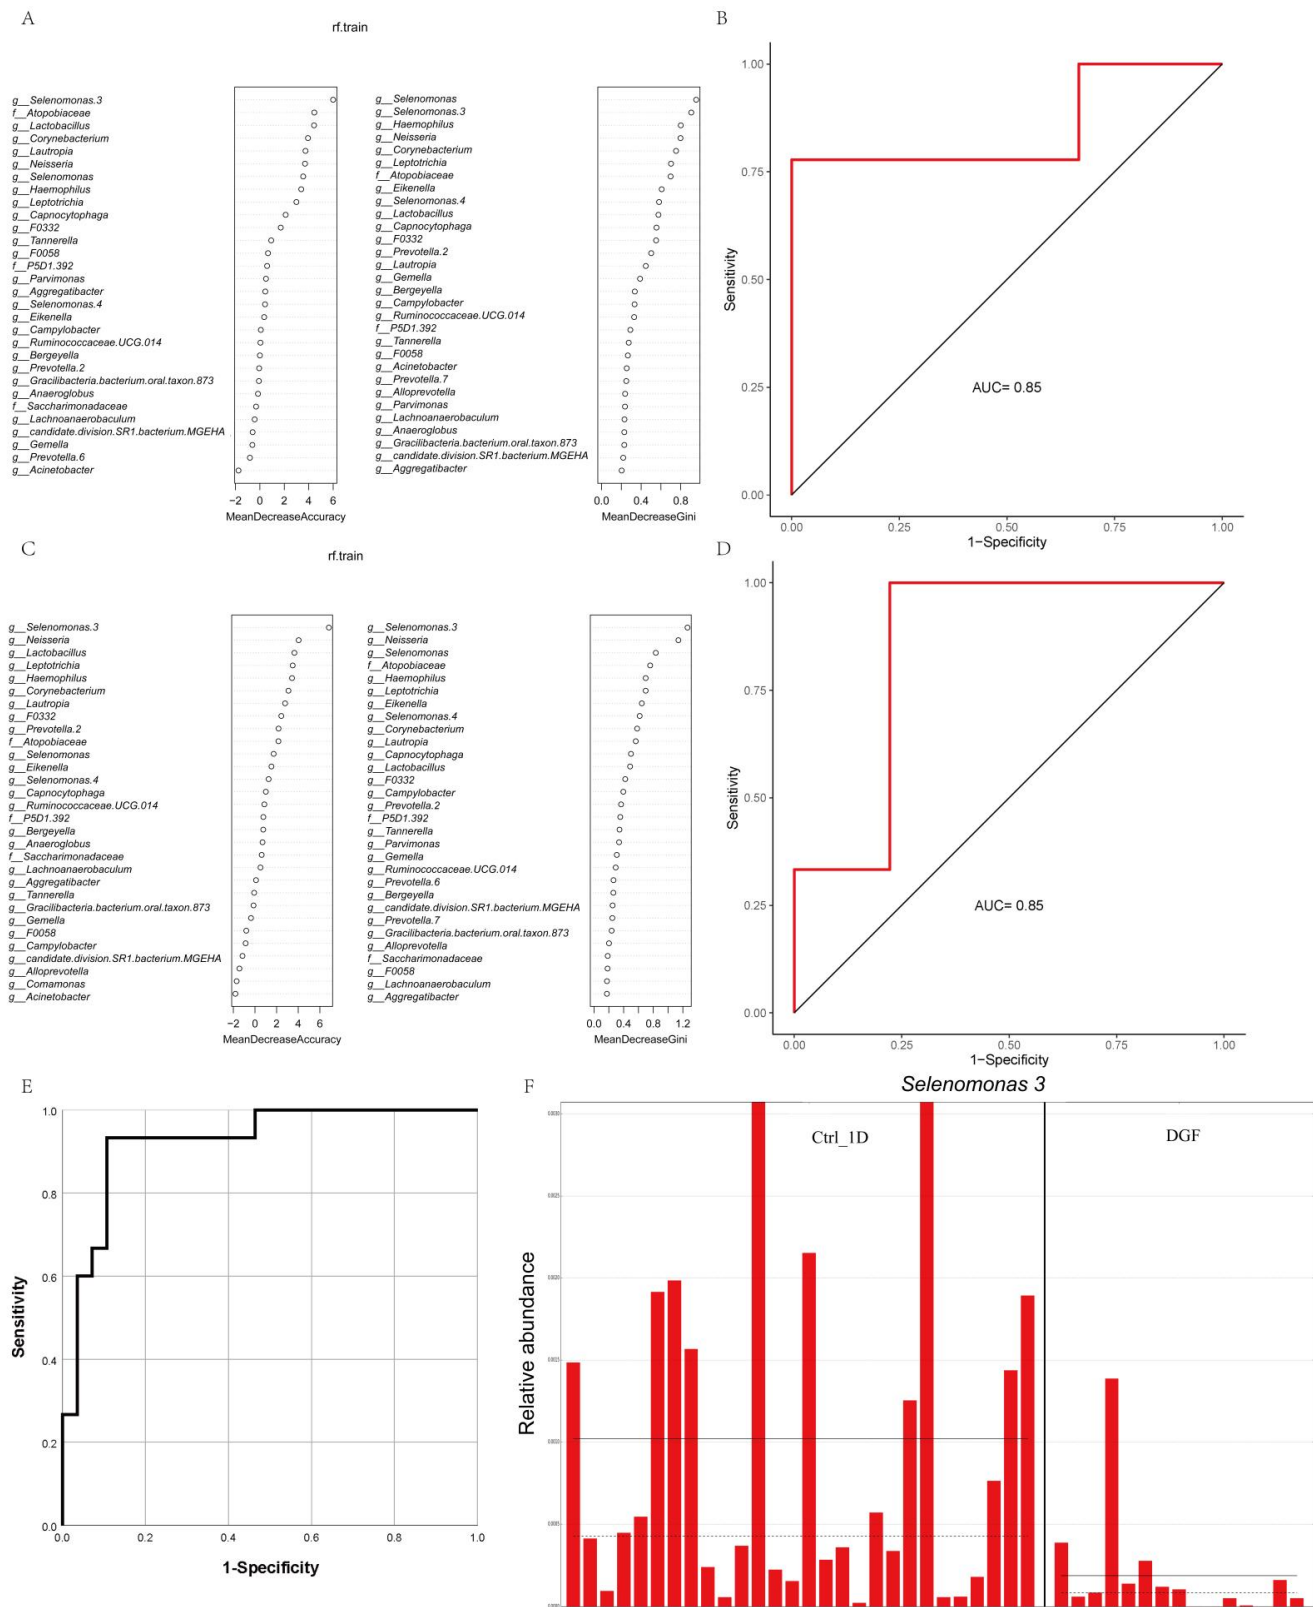

Supplemental Fig. S3. The model evaluation: (A) The mean decrease accuracy and mean decrease gini of taxa in randomForest model in logarithmic form; (B) The ROC curve of randomForest model in logarithmic form; (C) The mean decrease accuracy and mean decrease gini of taxa in randomForest model in original value form; (D) The ROC curve of randomForest model in original value form; (E) The ROC curve of multivariate binary logistic regression model in original value form; (F) The relative

abundance of *Selenomonas* 3 in each samples.
